# Supplementary material for: Integrating Biological Covariates into Gene Expression-Based Predictors of Radiation Sensitivity
Source: Hindawi journal article supplement (doi:10.1155/2017/6576840), 2017-01-01
Supplement: f1 [file 6576840.f1.pdf]

Supplemental Table 1: Cell Lines used in the experiments.

| Cell Line       | Recorded SF2 | Original 35 cell<br>line set | Expanded 48 cell<br>line set |
|-----------------|--------------|------------------------------|------------------------------|
| BREAST_BT549    | 0.632        | yes                          | yes                          |
| BREAST_HS578T   | 0.79         | yes                          | yes                          |
| BREAST_MDAMB231 | 0.82         | yes                          | yes                          |
| BREAST_T47D     | 0.52         | yes                          | yes                          |
| CNS_U251        | 0.57         | yes                          | yes                          |
| COLON_COLO205   | 0.69         | yes                          | yes                          |
| COLON_HCT116    | 0.38         | yes                          | yes                          |
| COLON_HCT15     | 0.4          | yes                          | yes                          |
| COLON_HT29      | 0.79         | yes                          | yes                          |
| MELAN_M14       | 0.42         | yes                          | yes                          |
| MELAN_MALME3M   | 0.8          | yes                          | yes                          |
| MELAN_SKMEL2    | 0.66         | yes                          | yes                          |
| MELAN_SKMEL28   | 0.74         | yes                          | yes                          |
| NSCLC_A549ATCC  | 0.61         | yes                          | yes                          |
| NSCLC_H460      | 0.84         | yes                          | yes                          |
| OVAR_OVCAR3     | 0.55         | yes                          | yes                          |
| OVAR_OVCAR5     | 0.408        | yes                          | yes                          |
| PROSTATE_DU145  | 0.52         | yes                          | yes                          |
| PROSTATE_PC3    | 0.484        | yes                          | yes                          |
| RENAL_A498      | 0.61         | yes                          | yes                          |
| RENAL_ACHN      | 0.72         | yes                          | yes                          |
| RENAL_CAK11     | 0.37         | yes                          | yes                          |
| BREAST_MCF7     | 0.576        | yes                          | yes                          |
| BREAST_MDAMB435 | 0.1795       | yes                          | yes                          |
| CNS_SF539       | 0.82         | yes                          | yes                          |
| COLON_KM12      | 0.42         | yes                          | yes                          |
| COLON_SW620     | 0.62         | yes                          | yes                          |
| LEUK_CCRFCM     | 0.185        | yes                          | yes                          |
| LEUK_HL60       | 0.315        | yes                          | yes                          |
| LEUK_MOLT4      | 0.05         | yes                          | yes                          |
| MELAN_LOXIMVI   | 0.68         | yes                          | yes                          |
| MELAN_SKMEL5    | 0.72         | yes                          | yes                          |
| NSCLC_HOP62     | 0.164        | yes                          | yes                          |
| NSCLC_NCIH23    | 0.086        | yes                          | yes                          |
| OVAR_SKOV3      | 0.9          | yes                          | yes                          |
| RENAL_SN12C     | 0.62         |                              | yes                          |
| CNS_SF268       | 0.45         |                              | yes                          |
| CNS_SNB19       | 0.43         |                              | yes                          |
| CNS_SNB75       | 0.55         |                              | yes                          |
| COLON_HCC-2998  | 0.44         |                              | yes                          |
| MELAN_UACC257   | 0.48         |                              | yes                          |
| MELAN_UACC62    | 0.52         |                              | yes                          |
| NSCLC_EKVX      | 0.7          |                              | yes                          |
| NSCLC_HOP92     | 0.43         |                              | yes                          |
| OVAR_OVCAR4     | 0.29         |                              | yes                          |
| OVAR_OVCAR8     | 0.6          |                              | yes                          |
| RENAL_7860      | 0.66         |                              | yes                          |
| RENAL_UO31      | 0.62         |                              | yes                          |
